# Supplementary material
Source: PubMed Central journal article supplement (PMC7995998)
Supplement: NIHMS1674948-supplement-1.pdf [file NIHMS1674948-supplement-1.pdf]

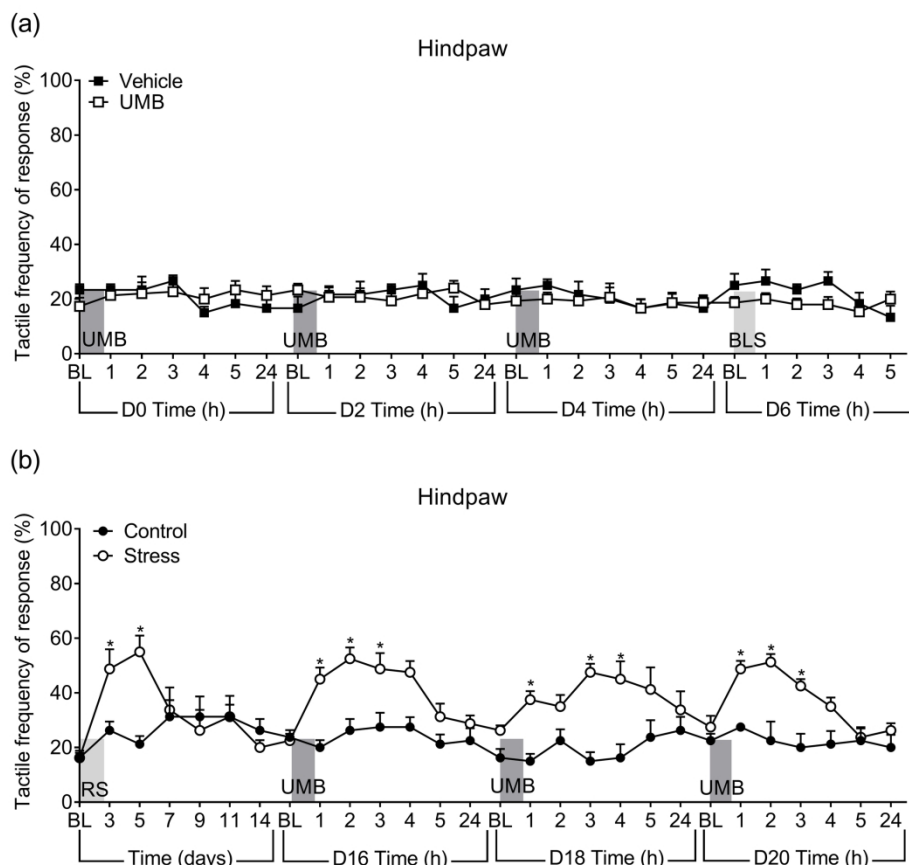

Supplementary Figure 1. UMB induced hindpaw CA only in female mice primed with RS. (a) Tactile frequency of response was assessed in naïve female mice at baseline (BL) and hourly after each of the 3 UMB inhalational exposure (0.01N/500  $\mu$ L, each) or after BLS exposure. (b) Baseline (BL) response was collected, followed by 3 consecutive days of RS. CA was assessed on indicated days after the first RS over a time course of 16 days. On days 16, 18 and 20, baseline (BL) was collected, followed by inhalational exposure of UMB, with CA measurements collected hourly for 5 hours. Data are presented as mean  $\pm$  S.E.M. and analyzed using two-way followed by Sidak's multiple comparison test with \* representing  $p < 0.05$  in comparison to Control group ( $n = 6 - 12$ ).

217x197mm (300 x 300 DPI)

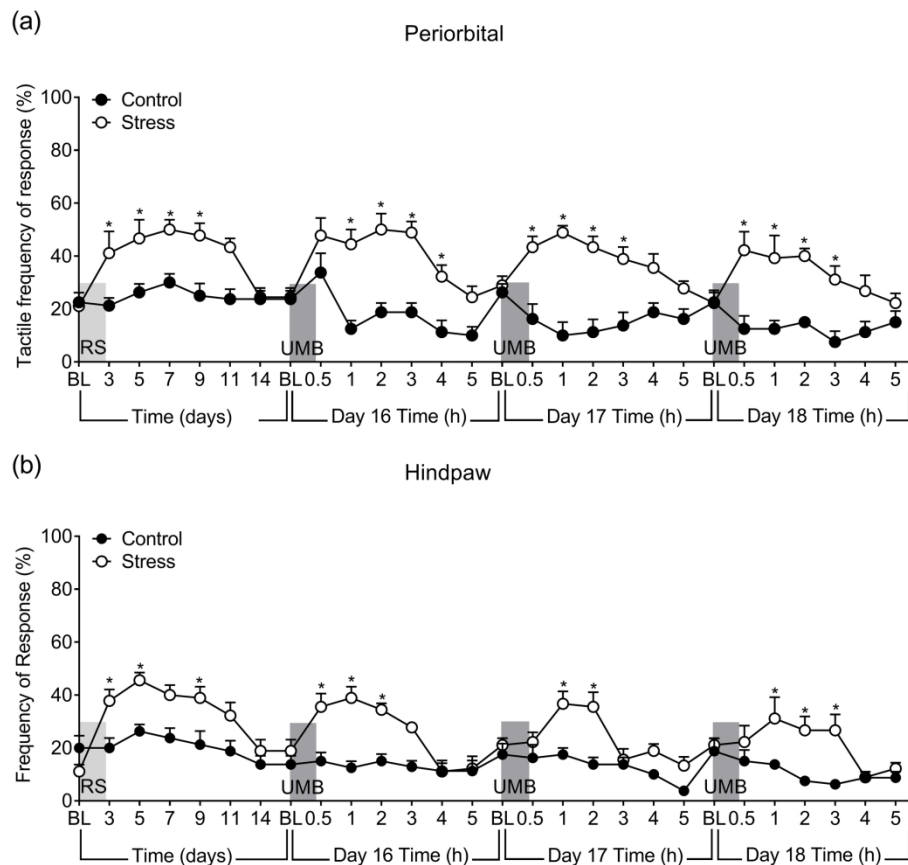

Supplementary Figure 2. UMB induced CA only in male mice primed with RS. (a) Periorbital and (b) hindpaw tactile frequency of response was collected at baseline (BL), followed by 3 days of RS. CA was assessed on indicated days after the first RS over a time course of 16 days. On days 16, 17 and 18, baseline (BL) was collected, followed by inhalational exposure of UMB, with measurements collected hourly for 5 hours. Data are presented as mean  $\pm$  S.E.M. and analyzed using two-way ANOVA followed by Sidak's multiple comparison test with \* representing  $p < 0.05$  in comparison to Control group ( $n = 8 - 9$ ).

220x199mm (300 x 300 DPI)

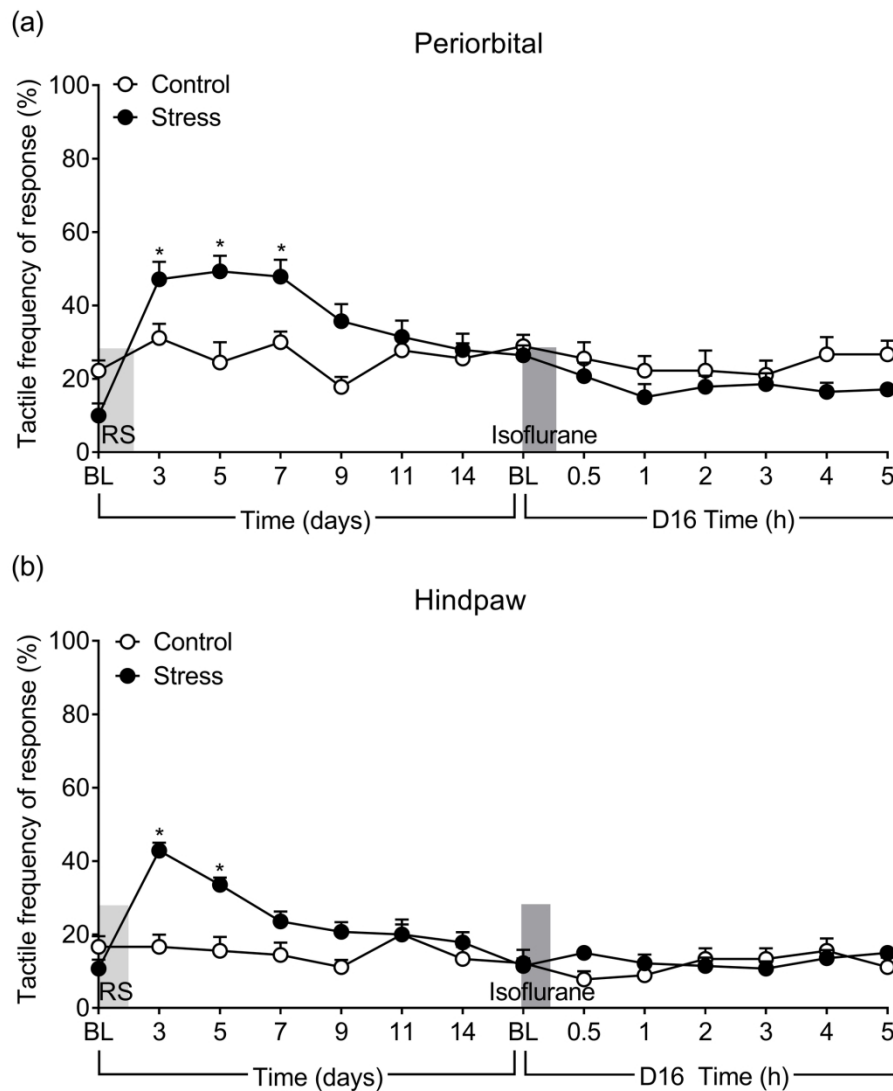

Supplementary Figure 3. TRPA1 agonist, isoflurane, did not induce CA in female mice primed with RS. (a) Periorbital and (b) hindpaw baseline (BL) tactile frequency of response was collected, followed by 3 days of RS. CA was assessed on indicated days over a time course of 16 days. On day 16, baseline (BL) was collected, animals were exposed to inhalation of isoflurane and tactile responses collected hourly for 5 hours. Data are presented as mean  $\pm$  S.E.M. and analyzed using two-way ANOVA followed by Sidak's multiple comparison test with \* representing  $p < 0.05$  in comparison to Control + Isoflurane group ( $n = 9 - 14$ ).

201x228mm (300 x 300 DPI)

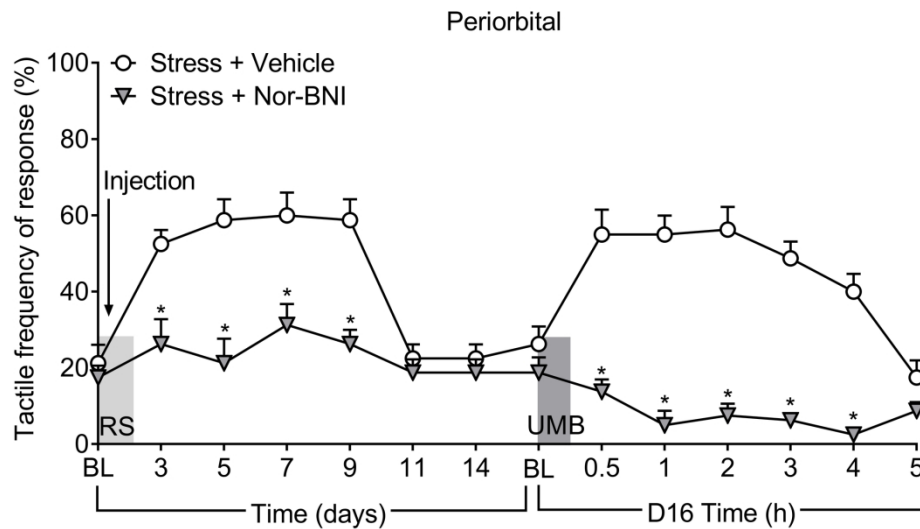

Supplementary Figure 4. Effects of nor-BNI in prevention of RS-induced and UMB-induced CA in male mice. Nor-BNI (10 mg/kg, s.c.) was given 2 hours prior the first RS in male mice and tactile responses assessed for 16 days and again in response to UMB on day 16. Data are presented as mean  $\pm$  S.E.M. and analyzed using Two-way ANOVA followed by Tukey's multiple comparison test with \* representing  $p < 0.05$  in comparison to Stress + Vehicle group, ( $n = 8/\text{group}$ ).

215x119mm (300 x 300 DPI)
